# Supplementary material
Source: Springer Nature journal article supplement (https://www.springerprofessional.de/resource/supplementary/40493_2014_8_MOESM12_ESM.pdf/11899610)

# The Efficiency of Minimum Efficient Attack

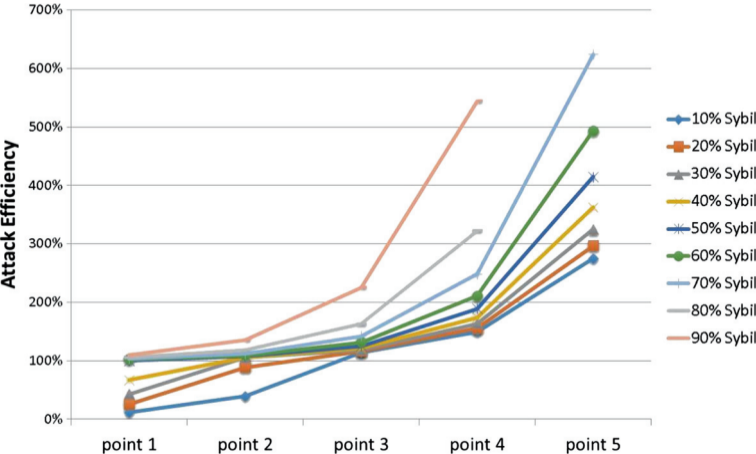

Supplement: MOESM12 [file 11899610]
